# Supplementary material for: Improvement of l-Leucine Production in Corynebacterium glutamicum by Altering the Redox Flux
Source: PubMed Central journal article supplement (PMC6515235; doi:10.3390/ijms20082020), 2019-04-24
Supplement: ijms-20-02020-s001.pdf [file ijms-20-02020-s001.pdf]

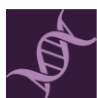

1 Supplementary file

# 2 Improvement of L-Leucine Production in 3 *Corynebacterium glutamicum* by Altering the Redox 4 Flux

5 Ying-Yu Wang<sup>1</sup>, Feng Zhang<sup>1</sup>, Jian-Zhong Xu<sup>1,2,\*</sup>, Wei-Guo Zhang<sup>1,\*</sup> and Xiu-Lai Chen<sup>3</sup>  
6 and Li-Ming Liu<sup>3</sup>

7 <sup>1</sup> The Key Laboratory of Industrial Biotechnology, Ministry of Education, School of Biotechnology, Jiangnan  
8 University, 1800# Lihu Road, WuXi 214122, China, wangyy0711@163.com (Y.-Y.W.);  
9 zhang20180606@sina.com (F.Z.)

10 <sup>2</sup> The Key Laboratory of Carbohydrate Chemistry and Biotechnology, Ministry of Education, School of  
11 Biotechnology, Jiangnan University, 1800# Lihu Road, WuXi 214122, China

12 <sup>3</sup> State key Laboratory of Food Science and Technology, Jiangnan University, Wuxi 214122, China;  
13 shirleyl1205@163.com (X.-L.C.), peidongchen13@163.com (L.-M.L.)

14 \* Correspondence: zhangwg168@163.com (W.-G.Z.); xujianzhong@jiangnan.edu.cn (J.-Z.X.); Tel/Fax:  
15 +86-510-85329312 (W.-G.Z.)  
16

## 17 1. sequence

### 18 *leuA* sequence

```
19 1 ATGCCAGTTA ACCGCTACAT GCCTTTCGAG GTTGAGGTAG AAGATATTTT TCTGCCGGAC  
20 61 CGCACTGGC CAGATAAAAA AATCACCGTT GCACCTCAGT GGTGTGCTGT TGACCTGCGT  
21 121 GACGGCAACC AGGCTCTGAT TGATCCGATG TCTCCTGAGC GTAAGCGCCG CATGTTTGAG  
22 181 CTGCTGGTTC AGATGGGATT CAAGGAAATC GAGGTCGGTT TCCCTTCAGC TTCCCAGACT  
23 241 GATTTTGATT TCGTTCGTGA GATCATCGAA AAGGACATGA TCCCTGACGA TGTCACCATT  
24 301 CAGGTTCTGG TTCAGGCTCG TGAGCACCTG ATTCGCCGTA CTTTTGAAGC TTGCGAAGGC  
25 361 GCAAAAAACG TTATCGTGCA CTTCTACAAC TCAACCTCCA TCCTGCAGCG CAACGTGGTG  
26 421 TTCCGCATGG ACAAGGTGCA GGTGAAGAAG CTGGCTACCG ATGCCGCTGA ACTGATCAAG  
27 481 ACCGTCGCTC AGGATTACCC AGACACCAAC TGGCGCTGGC AGTACTCCCC TGAGTCCTTC  
28 541 ACCGGCACTG AGGTTGAGTA CGCCAAGGAA GTTGTGGACG CAGTTGTTGA GGTCATGGAT  
29 601 CCAACTCCTG AGAACCCAAT GATCATCGAC CTGCCTTCCA CCGTTAAGAT GATCACCCCT  
30 661 AACGTTTACG CAGACTCCAT TGAATGGATG CACCGCAATC TAAACCGTCG TGATTCCATT  
31 721 ATCCTGTCCC TGCACCCGCA CAATGACCGT GGCACCGGCG TTGGCGCGGC TGAGCTGGGC  
32 781 TACATGGCTG GCGCTGACCG CATCGAAGGC TGCCTGTTTC GCAACGGCGA GCGCACCGGC  
33 841 AACGTCTGCC TGGTCACCCT GGCCTGAAC ATGCTGACCC AGGGCGTTGA CCCTCAGCTG  
34 901 GACTTCACCG ATATACGCCA GATCCGCAGC ACCGTTGAAT ACTGCAACCA GCTGCGCGTT  
35 961 CCTGAGCGCC ACCCATAACG CGGCGACCTG GTCTTCACCG CTTTCTCCGG TTCCCACCAG  
36 1021 GACGCTGTGA ACAAGGTCTT GGACGCCATG GCTGCCAAGG TTCAGCCAGG TGCTAGCTCC  
37 1081 ACTGAAGTTT CTTGGGAGCA GCTGCGCGAC ACCGAATGGG AGGTTCCCTTA CCTGCCTATC  
38 1141 GATCCAAAGG ATGTCCGTCG CGACTACGAG GCTGTTATCC GCGTGAACTC CCAGTCCGGC  
39 1201 AAGGGCGGCG TTGCTTACAT CATGAAGACC GATCACGGTC TGCAGATCCC TCGCTCCATG  
40 1261 CAGGTTGAGT TCTCCACCGT TGTCAGAAC GTCACCGACG CTGAGGGCGG CGAGGTCAAC  
41 1321 TCCAAGCAA TGTGGGATAT CTTCCGCCACC GAGTACCTGG AGCGCACCGC ACCAGTTGAG  
42 1381 CAGATCGCGC TCGCGTCTGA GAACGCTCAG ACCGAAAACG AGGATGCATC CATCACCGCC
```

43 1441 GAGCTCATCC ACAACGGCAA GGACGTCACC GTCGATGGCC ACGGCAACGG CCCACTGGCT  
 44 1501 GCTTACGCCA ACGCGCTGGA GAAGCTGGG ATCGACGTTG AGATCCAGGA ATACAACCAG  
 45 1561 CACGCCCCGA CCTCGGACGA CGATGCAGAA GCAGCCGCCT ACGTGCTGGC TGAGGTCAAC  
 46 1621 GGCCGCAAGG TCTGGGGCGT CGGCATCGCT GGCTCCATCA CCTACGCTTC GCTGAAGGCA  
 47 1681 GTGACCTCCG CCGTAAACCG CGCGCTGGAC GTCAACCACG AGGCAGTCCT GGCTGGCGGC  
 48 1741 GTTTAA  
 49 ***ilvB* sequence**  
 50 1 GTGAATGTGG CAGCTTCTCA ACAGCCCACT CCTGCCACGG TTGCAAGCCG TGGTCGATCC  
 51 61 GCCGCCCCCTG AGCGGATGAC AGGTGCACAG GCAATTGTTC GATCGCTCGA GGAGCTTAAC  
 52 121 GCCGACATCG TGTTCCGGTAT TCCTGGTGGT GCGGTGCTAC CGGTGTATGA CCCGCTCTAT  
 53 181 TCCTCCACAA AGGTGCGCCA CGTCTTAGTG CGCCACGAGC AGGGCGCAGG CCACGCAGCA  
 54 241 ACCGGCTACG CGCAGGTTAC TGGACGCGTT GGCGTCTGCA TTGCAACCTC TGGCCCAGGC  
 55 301 GCAACCAACT TGGTTACCCC AATCGCTGAT GCAAACCTGG ACTCCGTTCC CATGGTTGCC  
 56 361 ATCACCGGCC AGGTGCGAAG TAGCCTGCTG GGTACCGATG CTTTCCAGGA AGCCGATATC  
 57 421 CGCGGCATCA CCATGCCAGT GACCAAGCAC AACTTCATGG TCACCAACCC CAACGACATT  
 58 481 CCACAGGCAT TGGCTGAGGC ATCCACCTC GCGATTACTG GTCGCCCTGG TCCTGTTCTA  
 59 541 GTGGATATCC CCAAGGATGT TCAGAACGCT GAATTGGATT TCGTCTGGCC ACCAAAGATC  
 60 601 GACCTGCCAG GCTACCGCCC AGTTTCAACA CCGCATGCTC GACAGATTGA GCAGGCTGTC  
 61 661 AAAGTATCG GTGAGTCTAA GAAGCCTGTC CTTTACGTTG GCAGCGGCGT TATCAAGGCT  
 62 721 GATGCCACAG AAGAGCTTCG TCGGTTGTTG GAGCACACCG GCATTCCAGT TGTCACCACA  
 63 781 TTGATGGCGC TGGGAACCTT CCCAGAGTCC CACGAGCTGC ACATGGGTAT GCCAGGCATG  
 64 841 CATGGCACTG TGTCGGCTGT TGGTGCCTG CAGCGCAGCG ACCTGCTGAT TGCTATCGGC  
 65 901 TCCCGCTTTG ATGACCGCGT CACCGGTGAC GTTGACACTT TCGCACCTGA TGCCAAGATC  
 66 961 ATTCACGCCG ACATTGATCC TGCCGAAATC GGCAAGATCA AGCAGGTTGA GGTTCCAATC  
 67 1021 GTGGGCGATG CCCGCGAGGT TCTTGCTCGT CTGCTCGAAA CCACCAAGGC AAGCAAGGCA  
 68 1081 GAGTCTGAGG ACACCTCCGA GTGGGTGAC TACCTCAAGG GCCTCAAGGC ACGTTTCCCA  
 69 1141 CGTGGCTACG ACGAGCAGCC AGGCGATCTG CTGGCACCAC AGTTTGTTCAT TGAAACCCTG  
 70 1201 TCCAAGGAAG TTGGCCCCGA CGCAATTTAC TGCGCCGGCG TTGGCCAGCA CCAGATGTGG  
 71 1261 GCAGCTCAGT TCGTTGACTT CGAAAAGCCA CGCACCTGGC TCAACTCCGG TGGACTGGGC  
 72 1321 ACCATGGGCT ACGCAGTTCC TCGGCTCTT GGAGCAAAGG CTGGCGCACC TGACAAGGAA  
 73 1381 GTCTGGGCTA TCGACGGCGA CGGCTGTTT CAGATGACCA ACCAGAACT CACCACCGCC  
 74 1441 GCAGTTGAAG GTTTCCCAT TAAGATCGCA CTAATCAACA ACGGAAACCT GGGTATGGTT  
 75 1501 CGCCAATGGC AGACCCTATT CTATGAAGGA CGGTACTION AACTAAACT TCGTAACCAG  
 76 1561 GGCGAGTACA TGCCCGACTT TGTTACCCTT CCTGAGGGAC TTGGCTGTGT TGCCATCCGC  
 77 1621 GTCACCAAAG CGGAGGAAGT ACTGCCAGCC ATCCAAAAGG CACGAGAGAT CAACGACCGC  
 78 1681 CCAGTAGTCA TCGACTTCAT CGTCGGTGAA GACGCACAGG TATGGCCAAT GGTGTCTGCT  
 79 1741 GGATCATCCA ACTCCGATAT CCAGTACGCA CTCGGATTGC GCCCATTCTT TGATGGTGAT  
 80 1801 GAATCTGCAG CAGAAGATCC TGCCGACATT CACGAAGCCG TCAGCGACAT TGATGCCGCC  
 81 1861 GTTGAATCGA CCGAGGCATA A  
 82 ***ilvN* sequence**  
 83 1 ATGGCTAATT CTGACGTCAC CCGCCACATC CTGTCCGTAC TCGTTCAGGA CGTAGACGGA  
 84 61 ATCATTTCCT GCGTATCAGG TATGTTTACC CGACGCGCAT TCAACCTCGT GTCCCTCGTG  
 85 121 TCTGCAAAGA CCGAAACACT CGGCATCAAC CGCATCACGG TTGTTGTCGA CGCCGACGAG

86 181 CTCAACATTG AGCAGATCAC CAAGCAGCTC AACAAGCTGA TCCCCGTGCT CAAAGTCGTG  
87 241 CGACTTGATG AAGAAACCAC TATCGCCCCG GCAATCATGC TGGTTAAGGT TTCTGCGGAC  
88 301 AGCACCAACC GTCCGCAGAT CGTCGACGCC GCGAACATCT TCCGCGCCCG AGTCGTCGAC  
89 361 GTGGCTCCAG ACTCTGTGGT TATTGAATCC ACAGGCACCC CAGGCAAGCT CCGCGCACTG  
90 421 CTTGACGTGA TGGAACCATT CGGAATCCGC GAACTGATCC AATCCGGACA GATTGCACTC  
91 481 AACC GCGGTC CGAAGACCAT GGCTCCGGCC AAGATCTAA

92 ***ilvC* sequence**

93 1 ATGGCTATTG AACTGCTTTA TGATGCTGAC GCTGACCTCT CTTTGATCCA GGGCCGCAAG  
94 61 GTTGCCATCG TTGGCTACGG CTCCCAGGGC CACGCACACT CCCAGAACCT CCGCGATTCT  
95 121 GCGTTGAGG TTGTCATTGG TCTGCGCGAG GGCTCCAAGT CCGCAGAGAA GGCAAAGGAA  
96 181 GCAGGCTTCG AGGTCAAGAC CACCGCTGAG GCTGCAGCTT GGGCTGACGT CATCATGCTC  
97 241 CTGGCTCCAG ACACCTCCCA GGCAGAAATC TTCACCAACG ACATCGAGCC AAACCTGAAC  
98 301 GCAGGCGACG CACTGCTGTT CGGCCACGGC CTGAACATTC ACTTCGACCT GATCAAGCCA  
99 361 GCTGACGACA TCATCGTTGG CATGGTTGCG CCAAAGGGCC CAGGCCACTT GGTTCGCCGT  
100 421 CAGTTCGTTG ATGGCAAGGG TGTTCCCTGC CTCATCGCAG TCGACCAGGA CCCAACC GGA  
101 481 ACCGCACAGG CTCTGACCTT GTCCTACGCA GCAGCAATCG GTGGCGCACG CGCAGGCGTT  
102 541 ATCCCAACCA CCTTCGAAGC TGAGACCGTC ACCGACCTCT TCGGCGAGCA GGCTGTCTC  
103 601 TGCGGTGGCA CCGAGGAACT GGTC AAGGTT GGCTTCGAGG TTCTACCGA AGCTGGCTAC  
104 661 GAGCCAGAGA TGGCATACTT CGAGGTTCTT CACGAGCTCA AGCTCATCGT TGACCTCATG  
105 721 TTCGAAGGTG GCATCAGCAA CATGAACTAC TCTGTTTCTG ACACCGCTGA GTTCGGTGGC  
106 781 TACCTCTCCG GCCACGCGT CATCGATGCA GACACCAAGT CCCGCATGAA GGACATCCTG  
107 841 ACCGATATCC AGGACGGCAC CTTACCAAG CGCCTCATCG CAAACGTTGA GAACGGCAAC  
108 901 GCCGAGCTTG AGGGCCTTCG CGCTTCCTAC AACAACCACC CAATCGAGGA GACCGGCGCT  
109 961 AAGCTCCGCG ACCTCATGAG CTGGGTCAAG GTTGACGCTC GCGCAGAAAC CGCTTAA

110 ***ilvE* sequence**

111 1 GTGTATCTGT CAGGTAGCAG GTGTACCTTG AAATCCATGA CGTCATTAGA GTTCACAGTA  
112 61 ACCCGTACCG AAAATCCGAC GTCACCCGAT CGTCTGAAGG AAATTCTTGC CGCACCGAAG  
113 121 TTCGGTAAGT TCTTACCGA CCACATGGTG ACCATTGACT GGAACGAGTC GGAAGGCTGG  
114 181 CACAACGCCC AATTAGTGCC ATACGCGCCG ATTCCTATGG ATCCTGCCAC CACCGTATTC  
115 241 CACTACGGAC AGGCAATTTT TGAGGGAATT AAGGCCTACC GCCATTCGGA CGAAACCATC  
116 301 AAGACTTTCC GTCCTGATGA AAACGCCGAG CGTATGCAGC GTTCAGCAGC TCGAATGGCA  
117 361 ATGCCACAGT TGCCAACCGA GGACTTTATT AAAGCACTTG AACTGCTGGT AGACGCGGAT  
118 421 CAGGATTGGG TTCCTGAGTA CGGCGGGGAA GCGTCCCTCT ACCTGCGCCC ATTCATGATC  
119 481 TCCACCGAAA TTGGCTTGGG TGTCAGCCCA GCTGATGCCT ACAAGTTCCT GGTCATCGCA  
120 541 TCCCAGTCG GCGCTTACTT CACCGGTGGA ATTAAGCCTG TTTCCGTCTG GCTGAGCGAA  
121 601 GATTACGTCC GCGCTGCACC CGGCGGAACT GTGACGCCA AATTTGCTGG CAACTACGCG  
122 661 GCTTCTTTGC TTGCCAGTC CCAGGCTGCG GAAAAGGGCT GTGACCAGGT CGTATGGTTG  
123 721 GATGCCATCG AGCACAAGTA CATCGAAGAA ATGGGTGGCA TGAACCTTGG GTTCATCTAC  
124 781 CGCAACGGCG ACCACGTCAA GCTAGTCACC CCTGAACTTT CCGGCTCACT ACTTCCAGGC  
125 841 ATCACCCGCA AGTCACTTCT ACAAGTAGCA CGCGACTTGG GCTACGAAGT AGAAGAGCGA  
126 901 AAGATCACCA CCACCGAGTG GGAAGAAGAC GCAAAGTCTG GCGCCATGAC TGAGGCATTT  
127 961 GCTT GCGGTA CTGCAGCTGT TATCACCCCT GTTGGCACCG TGAAATCAGC TCACGGCACC  
128 1021 TTCGAAGTGA ACAACAATGA AGTCGGAGAA ATCACGATGA AGCTTCGTGA AACCTCACC

129 1081 GGAATTCAGC AAGGAAACGT TGAAGACCAA AACGGATGGC TTTACCCACT GGTGGCTAA

130

131

**Table S1.** The NADPH concentration of *C. glutamicum* strains

| Strains                                                                        | NADPH ( $\mu\text{mol g}^{-1}$ ) |
|--------------------------------------------------------------------------------|----------------------------------|
| XQ-9                                                                           | 2.78±0.16                        |
| $\Delta\text{LtbR}/\text{ABNCE}$                                               | 3.48±0.21                        |
| $\Delta\text{LtbR-AHAIR}^{\text{M}}/\text{ABNC}^{\text{ME}}$                   | 3.92±0.33                        |
| $\Delta\text{LtbR-AHAIR}^{\text{M}}\text{LeuDH}/\text{ABNC}^{\text{MLDH}}$     | 5.34±0.26                        |
| $\Delta\text{LtbR-AHAIR}^{\text{M}}\text{LeuDHRocG}/\text{ABNC}^{\text{MLDH}}$ | 5.61±0.17                        |

132

The data are averages from triplicate experiments.

133

134

**Table S2.** Oligonucleotides used in this study

| oligonucleotides          | Sequence(5'-3') <sup>a</sup>                    | Overhung restriction sites <sup>b</sup> |
|---------------------------|-------------------------------------------------|-----------------------------------------|
| <i>leuA</i> -F            | CCGGAATTCGAAAGGAGATATACCATGCCAGTTAACCGCT        | <i>EcoRI</i>                            |
| <i>leuA</i> -R            | CGGGGTACCAGGCGTCGTAAAGCT                        | <i>KpnI</i>                             |
| <i>ilvBNC</i> -F          | TCCCCCGGGGAAAGGAGATATACCGTGAATGTGGCAGCTTCTC     | <i>SmaI</i>                             |
| <i>ilvBNC</i> -R          | GCTCTAGATTAAGCGGTTTCTGCG                        | <i>XbaI</i>                             |
| <i>ilvE</i> -F            | GCTCTAGAGAAAGGAGATATACCGTGTATCTGTCAGGTAGCAGGTGT | <i>XbaI</i>                             |
| <i>ilvE</i> -R            | GCTCTAGATTAGCCAACCAAGTGGGTAAAGCCAT              | <i>XbaI</i>                             |
| <i>rocG</i> -F            | CGAGCTCGAAAGGAGATATACCATGTCAGCAAAGCAAG          | <i>SacI</i>                             |
| <i>rocG</i> -R            | CCCAAGCTTTTAGACCCATCCGCGG                       | <i>HindIII</i>                          |
| $P_{\text{tac-rocG}}$ -F  | GCTCTAGACATCATAACGGTTCTGG                       | <i>XbaI</i>                             |
| $P_{\text{tac-rocG}}$ -R  | ACGCGTCGACACCATCGGCGCTACGG                      | <i>SalI</i>                             |
| $P_{\text{tac-leuDH}}$ -F | GCTCTAGAACCATCGGCGCTACGG                        | <i>XbaI</i>                             |
| $P_{\text{tac-leuDH}}$ -R | GCTCTAGACATCATAACGGTTCTGG                       | <i>XbaI</i>                             |
| <i>ilvC</i> -F            | CCGGAATTCATGGCTATTGAACTGCT                      | <i>EcoRI</i>                            |
| <i>ilvC</i> -R            | CCCAAGCTTTTAAGCGGTTTCTGCG                       | <i>HindIII</i>                          |
| <i>ilvCM1</i> -F          | GGCCACGCACACGGCCAGAACCTCCGCGATTCTG              |                                         |
| <i>ilvCM1</i> -R          | CAGAATCGCGGAGGTTCTGGCCGTGTGCGTGGCC              |                                         |
| <i>ilvCM2</i> -F          | GAGGTTGTCATTGGTGAATTTCGAGGGCTCCAAGTCC           |                                         |
| <i>ilvCM2</i> -R          | GGACTTGGAGCCCTCGAACTCACCAATGACAACCTC            |                                         |
| <i>ltbR-U</i> -F          | CCCAAGCTTTCACAGTTGTCGCGCAG                      | <i>HindIII</i>                          |
| <i>ltbR-U</i> -R          | AAGCTCACCTTGAATTTAGCATTTCACCC                   |                                         |
| <i>ltbR-D</i> -F          | ATTCAAGGTGAGCTTTTCGACGCAC                       |                                         |
| <i>ltbR-D</i> -R          | CGCGGATCCGATCGGATTCCTGGCT                       | <i>BamHI</i>                            |
| <i>ilvE-U</i> -F          | TCCCCCGGGCAAGCCTAGCCATTCTCCT                    | <i>SmaI</i>                             |
| <i>ilvE-U</i> -R          | GCTCTAGACGTCTACCAGCAGTTCAAG                     | <i>XbaI</i>                             |
| <i>ilvE-D</i> -F          | GCTCTAGATGGGATACGAAAGTAGAAGAGC                  | <i>XbaI</i>                             |
| <i>ilvE-D</i> -R          | ACGCGTCCGACTTTCCAACCGTCAGCTG                    | <i>SalI</i>                             |
| <i>gdh-U</i> -F           | TCCCCCGGGACCAGCCTAAATGCCCG                      | <i>SmaI</i>                             |
| <i>gdh-U</i> -R           | GCTCTAGATGACGTGGACCTGGCC                        | <i>XbaI</i>                             |
| <i>gdh-D</i> -F           | ACGCGTCCGACTCGGACCAGGCAAGG                      | <i>SalI</i>                             |
| <i>gdh-D</i> -R           | GCCTGCAGTTAGATGCTGACGCC                         | <i>PstI</i>                             |

135 <sup>a</sup> mutation sites in oligonucleotides are bolded, complementary sequences in oligonucleotides are italicized.

136 <sup>b</sup> each overhung restriction sites used for cloning procedure is underlined.

137

## 138 2. Plasmid Constructions

139 According to standard protocols, routine methods of molecular cloning like PCR, DNA  
140 restriction, and ligation were carried out [1].

141 Vector pK18*mobsacB*- $\Delta$ *ltbR* was constructed via an overlap-extension PCR—the region  
142 upstream (approximately 500 bp) of the *ltbR*, as well as the downstream region (approximately 690  
143 bp) of *ltbR*, were amplified via oligonucleotide pairs *ltbR*-U-F/ *ltbR*-U-R and *ltbR*-D-F/ *ltbR*-D-R,  
144 respectively, from genomic DNA of *C. glutamicum* XQ-9. The amplified DNA fragments were fused  
145 in an overlap-extension PCR, resulting in a 1190 bp PCR product that was amplified with *ltbR*-U-F  
146 and *ltbR*-D-R. This fragment was digested with the restriction enzymes *Hind*III and *Bam*HI and  
147 ligated into the equally digested vector pK18*mobsacB*.

148

149 The plasmid pK18*mobsacB*- $\Delta$ *ilvE*::*leuD*H was constructed as follows—the region upstream  
150 (approximately 490 bp) of *ilvE*, as well as the downstream region (approximately 530 bp) of *ilvE*,  
151 were amplified via oligonucleotide pairs *ilvE*-U-F/*ilvE*-U-R and *ilvE*-D-F/*ilvE*-D-R, respectively,  
152 from genomic DNA of *C. glutamicum* XQ-9. The upstream fragment was digested with the  
153 restriction enzymes *Sma*I and *Xba*I and ligated into the equally digested vector pK18*mobsacB*. Then,  
154 the downstream fragment was digested with the restriction enzymes *Xba*I and *Sal*I and ligated into  
155 the equally digested vector pK18*mobsacB*- $\Delta$ *ilvE*-U. The *leuD*H gene (1095 bp) supplemented with an  
156 SD sequence (GAAAGGAGATATACC) before ATG was synthesized by General Biosystems Co.  
157 Ltd (Anhui, China) using pUC-57 as vector. Promoter and terminator elements can be used from  
158 pDXW-8. Thus, *leuD*H gene was digested with the restriction enzymes *Eco*RI and *Kpn*I and ligated  
159 into the vector pDXW-8 that had been digested with the same enzymes. The P<sub>tac</sub>-*leuD*H-*rrnBT1T2*  
160 fragment was amplified via oligonucleotide pairs P<sub>tac</sub>-*leuD*H-F/P<sub>tac</sub>-*leuD*H-R from plasmid  
161 pDXW-8-*leuD*H. The fragment was digested with the restriction enzyme *Xba*I and ligated into the  
162 equally digested vector pK18*mobsacB*- $\Delta$ *ilvE*.

163

164 For construction of pEC-*leuAilvBNC*E, pEC-*leuAilvBNC*<sup>ME</sup> and pEC-*leuAilvBNC*<sup>M</sup>*leuD*H, the  
165 *leuA*, *ilvBNC*, and *ilvE* genes were amplified via oligonucleotides *leuA*-F/*leuA*-R, *ilvBNC*-F/*ilvBNC*-R,  
166 and *ilvE*-F/*ilvE*-R, respectively, from genomic DNA of *C. glutamicum* XQ-9. The *leuA* fragment was  
167 digested with the restriction enzymes *Eco*RI and *Kpn*I and ligated into the vector pECXK99E that  
168 had been digested with the same enzymes. The *ilvBNC* fragment was digested with the restriction  
169 enzymes *Sma*I and *Xba*I and ligated into the equally digested vector pEC-*leuA*. The *ilvE* fragment  
170 was digested with the restriction enzyme *Xba*I and ligated into the equally digested vector  
171 pEC-*leuAilvBNC*. Due to the single-restricted ligation, the correct pEC-*leuAilvBNC*E plasmid was  
172 verified by DNA sequencing. Site-directed mutagenesis was performed using the Mut ExpressR II  
173 Fast Mutagenesis Kit V2 (Vazyme, Nanjing, China), following the manufacturer's instructions.  
174 Using pEC-*leuAilvBNC*E as a template, PCR products were orderly amplified via oligonucleotides  
175 *ilvCM1*-F/ *ilvCM1*-R, and *ilvCM2*-F/ *ilvCM2*-R. Subsequently, methylated templates of the PCR

176 products were digested with *DpnI*, and the resultant products were performed by recombinase  
177 Exnase II in vitro. The product could be amplified in vivo by transforming *E. coli*. The correctness of  
178 the plasmid resulting from site-directed mutagenesis was verified by DNA sequencing. For  
179 construction of pEC-*leuAilvBNC*<sup>leuD<sub>H</sub></sup>, P<sub>tac</sub>-*leuD<sub>H</sub>-rrnBT1T2* fragment was amplified via the  
180 oligonucleotide pair P<sub>tac</sub>-*leuD<sub>H</sub>-F*/P<sub>tac</sub>-*leuD<sub>H</sub>-R* from plasmid pDXW-8-*leuD<sub>H</sub>*. The fragment was  
181 digested with the restriction enzyme *XbaI* and ligated into the equally digested vector  
182 pEC-*leuAilvBNC*. The correctness of the plasmid resulting from site-directed mutagenesis was  
183 verified by DNA sequencing.  
184

185 To obtain the vectors pET28a-*ilvC*, pET28a-*ilvC*<sup>CM</sup>, and pk18*mobsacB-ilvC*<sup>CM</sup>, a 1117 bp PCR  
186 fragment was generated from the genomic DNA of *C. glutamicum* wild type. It covered the whole  
187 sequence of *ilvC*. The fragment was cut with the restriction enzymes *EcoRI* and *HindIII* and ligated  
188 into the vectors pET28a and pk18*mobsacB* that had been digested with the same enzymes,  
189 respectively. Site-directed mutagenesis was performed using the Mut ExpressR II Fast Mutagenesis  
190 Kit V2 (Vazyme, Nanjing, China), following the manufacturer's instructions. Using pET28a-*ilvC* and  
191 pk18*mobsacB-ΔilvC* as templates, PCR products was orderly amplified via oligonucleotides  
192 *ilvCM1-F*/*ilvCM1-R* and *ilvCM2-F*/*ilvCM2-R*. Subsequently, methylated templates of PCR products  
193 were digested with *DpnI*, and the resultant products were performed by recombinase Exnase II in  
194 vitro. The product could be amplified in vivo by transforming *E. coli*. The correctness of the plasmid  
195 resulting from site-directed mutagenesis was verified by DNA sequencing.  
196

197 For construction of vector pK18*mobsacB-Δgdh::rocG*, the step was similar—amplifying the  
198 upstream and downstream region for *gdh* via oligonucleotides *ilvE-U-F*/*ilvE-U-R* and  
199 *ilvE-D-F*/*ilvE-D-R*, respectively, from the genomic DNA of *C. glutamicum* XQ-9. The upstream  
200 fragment was digested with the restriction enzymes *SmaI* and *XbaI* and ligated into the equally  
201 digested vector pK18*mobsacB*. Then, the downstream fragment was digested with the restriction  
202 enzymes *SalI* and *PstI* and ligated into the equally digested vector pK18*mobsacB-Δgdh-U*. The *rocG*  
203 gene was amplified via the oligonucleotide pair *rocG-F*/*rocG-R* from genomic DNA of *Bacillus*  
204 *subtilis* 168. The *rocG* gene was digested with the restriction enzymes *SacI* and *HindIII* and ligated  
205 into the vector pDXW-8 that had been digested with the same enzymes. The P<sub>tac</sub>-*rocG-rrnBT1T2*  
206 fragment was amplified via oligonucleotide pair P<sub>tac</sub>-*rocG-F*/P<sub>tac</sub>-*rocG-R* from plasmid pDXW-8-*rocG*.  
207 The fragment was digested with the restriction enzymes *SalI* and *XbaI* and ligated into the equally  
208 digested vector pK18*mobsacB-Δgdh*.

## 209 Reference

- 210 1. Sambrook, J.; David, W. *Molecular Cloning: A Laboratory Manual*, 3rd ed.; Cold Spring Harbor  
211 Laboratory Press: New York, NY, USA, 2001; ISBN-10 0879695773, ISBN-13 978-0879695774.  
212

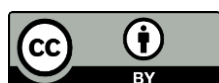

© 2019 by the authors. Submitted for possible open access publication under the terms and conditions of the Creative Commons Attribution (CC BY) license (<http://creativecommons.org/licenses/by/4.0/>).
